# Supplementary material
Source: publisher figshare collection journal article supplement (https://gsapubs.figshare.com/ndownloader/files/22741730)
Supplement: Supplementary file 1 [file 22741730]

GSA Data Repository Item # 91-23

Title of article Evidence for major mass transfer and volume strain  
during regional metamorphism of pelites

Author(s) Jay J. Ague

see Geology v. 19, p. 855 - 858

### Contents

3 pg.

---

---

---

---

---

---

---

---

---

---

## REFERENCES FOR TABLE 2 IN: AGUE, J.J., 1991, EVIDENCE FOR MAJOR MASS TRANSFER AND VOLUME STRAIN DURING REGIONAL METAMORPHISM OF PELITES: GEOLOGY

As discussed in the paper, rock analyses were not used in the data base if: 1)  $\text{Al}_2\text{O}_3$  was less than 12 weight percent, or 2)  $\text{CaO}$  was greater than 6 weight percent. This was done in order to exclude rock types such as sandstones and marls.

- 1) **Ague, J.J., and Morris, A.P., 1985**, Metamorphism of the Müllerneset Formation, St. Jonsfjorden, Svalbard: Polar Research, v. 3, p. 93-106.

Appendix 2, p. 106.

- 2) **Barth, T.F.W., 1936**, Structural and petrologic studies in Dutchess County, New York: Geological Society of America Bulletin, v. 47, p. 775-850.

Table 12, p. 799: 12; Table 13, p. 802: 5-7; Table 14, p. 804: 9; Table 15, p. 808: 10, 11; Table 19, p. 815: 19

- 3) **Bastin, E.S., 1909**, Chemical composition as a criterion in identifying metamorphosed sediments: Journal of Geology, v. 17, p. 445-472.

Table I, p. 456: Slates and phyllites

- 4) **Butler, B.C.M., 1965**, A chemical study of some rocks of the Moine Series of Scotland: Quarterly Journal of the Geological Society of London, v. 121, p. 163-208.

Table 2: 1, 4, 5, 7-14, 16-22; Table 3: B, C, H, I, J, M, P, Q, R, T, V, F', K'. Contact metamorphic rocks, migmatites, and granitic gneisses were not used.

- 5) **Cameron, E.M., and Garrels, R.M., 1980**, Geochemical compositions of some Precambrian shales from the Canadian shield: Chemical Geology, v. 28, p. 181-197.

Table 1, p. 186: 1-18

- 6) **Card, K.D., 1964**, Metamorphism in the Agnew Lake area, Sudbury District, Ontario, Canada: Geological Society of America Bulletin, v. 75, p. 1011-1030.

Table 2, p. 1015: 1, 2, 3, 7, 8

- 7) **Clarke, F.W., 1915**, Analyses of rocks and minerals: U.S. Geological Survey Bulletin 591, 376 p.

p. 36: O; p. 50: G; p. 62: G, C; p. 70: O; p. 73: O; p. 121: Y; p. 154: E, F; p. 250: A-C, E, G, H; p. 251: K, B; p. 253: D, p. 255 A (Minnesota), A-D (Colorado); p. 256: A (Arizona); p. 257: J

8) **Clarke, F.W., 1924**, The data of geochemistry: U.S. Geological Survey Bulletin 770, 841 p.

p. 552: A, B; p. 554: A-D, F; p. 625: H; p. 626: F; p. 631: B

9) **Dale, T.N., 1906**, Slate deposits and slate industry of the United States: U.S. Geological Survey Bulletin 275, 154 p.

p. 34: I-IV, VI, XI-XIV. Same analyses used by Shaw (1956).

10) **Eckel, E.C., 1904**, On the chemical composition of American shales and roofing slates: *Journal of Geology*, v. 12, p. 25-29.

Table 1, p. 26

11) **Ferry, J.M., 1982**, A comparative geochemical study of pelitic schists and metamorphosed carbonate rocks from south-central Maine, USA: *Contributions to Mineralogy and Petrology*, v. 80, p. 59-72.

Table 3, p. 64. This table lists average values. However, the individual analyses were used in the Ague paper.

12) **Ferry, J.M., 1988**, Infiltration-driven metamorphism in Northern New England, USA: *Journal of Petrology*, v. 29, p. 1121-1159.

Table 3, p. 1135: LW2A, NHdlO, C4E, Q1B

13) **Flanagan, F.J., 1973**, 1972 values for international geochemical reference samples: *Geochimica et Cosmochimica Acta*, v. 37, p. 1189-1200.

Table 1, p. 1190: ZGI-TB; Table 2, p. 1199: ZGL-TH

14) **Gromet, L.P., Dymek, R.F., Haskin, L.A., and Korotev, R.L., 1984**, The "north American shale composite": Its compilation, major and trace element characteristics: *Geochimica et Cosmochimica Acta*, v. 48, p. 2469-2482.

Table 4, p. 2475: 1

15) **Haack, U., Heinrichs, H., Boneß, M., and Schneider, A., 1984**, Loss of metals from pelites during regional metamorphism: *Contributions to Mineralogy and Petrology*, v. 85, p. 116-132.

Table 3a, p. 120-121. High-grade K-feldspar+ cordierite rocks involved in partial melting were not used.

16) **Nanz, R.H., Jr., 1953**, Chemical composition of Pre-Cambrian slates with notes on the geochemical evolution of lutites: *Journal of Geology*, v. 61, p. 51-64.

Table 1, p. 53-54: 1, 3-6, 8-18, 21, 23, 25-27, 29-31, 33. Rocks of uncertain metamorphic

grade and Fe-formation samples were not used.

- 17) Phillips, G.N., 1988**, Widespread fluid infiltration during metamorphism of the Witwatersrand goldfields: Generation of chloritoid and pyrophyllite: *Journal of Metamorphic Geology*, v. 6, p. 311-332.

Table 2, p. 316

- 18) Ronov, A.B., and Migdisov, A.A., 1971**, Geochemical history of the crystalline basement and the sedimentary cover of the Russian and north American platforms: *Sedimentology*, v. 16, p. 137-185.

Table III: Shale analyses

- 19) Shaw, D.M., 1956**, Geochemistry of pelitic rocks. Part III: Major elements and general geochemistry: *Geological Society of America Bulletin*, v. 67, p. 919-934.

Table 2, p. 922

- 20) Simonen, A., 1953**, Stratigraphy and sedimentation of the Svecofennidic, Early Archean supracrustal rocks in southwestern Finland: *Bulletin de la Commission Géologique de Finlande*, v. 27, No. 160, 64 p.

Table IV, p. 32: 2-4, 6, 7, 9, 10

- 21) Van Hise, C.R., 1904**, U.S. Geological Survey Monograph 47.

p. 895; p. 896: C

- 22) Wells, R.C., 1937**, Analyses of rocks and minerals: U.S. Geological Survey Bulletin 878, 134 p.

p. 11: A; p. 23: R; p. 28: E

- 23) Williamson, D.H., 1953**, Petrology of chloritoid and staurolite rocks north of Stonehaven, Kincardineshire: *Geological Magazine*, v. 90, p. 353-361.

Table 1, p. 358: 1-7; Table 2, p. 359: 8-11

- 24) Yardley, B.W.D., 1977**, Relationships between the chemical and modal compositions of metapelites from Connemara, Ireland: *Lithos*, v. 10, p. 235-242.

Table 1, p. 236; Table 2, p. 237.
